# Supplementary material for: Mechanisms of Chromium and Uranium Toxicity in Pseudomonas stutzeri RCH2 Grown under Anaerobic Nitrate-Reducing Conditions
Source: PubMed Central journal article supplement (PMC5554334; doi:10.3389/fmicb.2017.01529), 2017-08-10
Supplement: Presentation1.pdf [file Presentation1.pdf]

**Mechanisms of Uranium and Chromium Toxicity in *Pseudomonas stutzeri* RCH2 Grown  
Under Anaerobic Nitrate-Reducing Conditions**

Michael P. Thorgersen<sup>a</sup>, W. Andrew Lancaster<sup>a</sup>, Xiaoxuan Ge<sup>a</sup>, Grant M. Zane<sup>b</sup>, Kelly M.  
Wetmore<sup>c</sup>, Brian J. Vaccaro<sup>a</sup>, Farris L. Poole<sup>a</sup>, Adam Younkin<sup>b</sup>, Adam M. Deutschbauer<sup>c</sup>,  
Adam P. Arkin<sup>c</sup>, Judy D. Wall<sup>b</sup> and Michael W. W. Adams<sup>a#</sup>

<sup>a</sup>Department of Biochemistry & Molecular Biology, University of Georgia, Athens, GA, 30602

<sup>b</sup>Department of Biochemistry, University of Missouri, Columbia, Mo 65211

<sup>c</sup>Environmental Genomics and Systems Biology Division, Lawrence Berkeley National  
Laboratory, Berkeley, CA 94720

Running Title: Anaerobic U and Cr Toxicity

**Supplementary Material**

**Tables S1 – S4**

**Figures S1 – S3**

**Table S1. Quality metrics for RB-TNSeq data**

| Condition                                                 | Median<br>SE | SE<br>Min | SE<br>Max | MAD12 | Average Reads/Gene |
|-----------------------------------------------------------|--------------|-----------|-----------|-------|--------------------|
| Control                                                   | 0.148        | 0.002     | 1.7       | 0.26  | 1494               |
| 120 $\mu$ M K <sub>2</sub> Cr <sub>2</sub> O <sub>7</sub> | 0.154        | 0.003     | 1.6       | 0.27  | 1378               |
| 3 mM Uranyl Acetate                                       | 0.152        | 0.002     | 2.0       | 0.26  | 1475               |

Standard error (SE) was calculated for each gene under all three conditions. The MAD12 is the median absolute difference {Wetmore, 2015}. The number of reads for each gene from all sequencing runs within a condition were summed and the average value is reported (Average Reads/Gene).

**Table S2. Table of primers used for construction of marker-exchange plasmid in this study.**

| Primer Name         | Primer Sequence*                                                       |
|---------------------|------------------------------------------------------------------------|
| Psest_2088-upF      | <b>CGGCTGCAACTTTGTCATGCTT</b> GCGCTA<br>TAGCTTCGGTGAGGTGC              |
| Psest_2088-upR      | <b>TGCCTTCTTGACGAGTTCTTCTGACGTT</b><br>CTTAATGATTCGCTGCATAGACGC        |
| Psest_2088-dnF      | <b>GCGCCCCAGCTGGCAATTCCGGG</b> GCTTCA<br>TTGATACATCCAGAAATTAGGGTGTTCCG |
| Psest_2088-dnR      | <b>CGAGGCATTTCTGTCTGGCTGGGGTAC</b><br>TCATTTCCAGGCTAGCGTTCTG           |
| SpecRpUC-F          | CCAGCCAGGACAGAAATGCCTCG                                                |
| SpUrT-R             | CAAGCATGACAAAGTTGCAGCCG                                                |
| Kan gene Prom Nterm | CCGGAATTGCCAGCTGGGGCGC                                                 |
| KanR                | TCAGAAGAAGTCAAGGCGA                                                    |
| oriT-out            | CCTCGTTCAACAGGTCCAGGG                                                  |
| pMO719-XbaI-dn      | TGGGTTCGTGCCTTCATCCG                                                   |
| Km_int_Fwd_revcomp  | CTCATCCTGTCTCTTGATCAGATCT                                              |
| Kan_out_C           | CTGACCGCTTCTCGTGC                                                      |

\* Bolded region of primers are overhang used for cloning with plasmid backbone or kanamycin-resistance marker.

**Table S3. Genes with  $\Delta wCr \geq 1$** 

| Locus Tag                  | Gene Function                                | $w_{ctrl}$ | $w_{ctrl}$ | $wCr$ | $wCr$ | $\Delta wCr$ |
|----------------------------|----------------------------------------------|------------|------------|-------|-------|--------------|
|                            |                                              | AVE        | STDEV      | AVE   | STDEV | Delta        |
| <b>DNA Repair</b>          |                                              |            |            |       |       |              |
| Psest_3100                 | RNA polymerase sigma factor RpoE             | 0.3        | 0.1        | 1.3   | 0.2   | 1.0          |
| <b>Sulfur Assimilation</b> |                                              |            |            |       |       |              |
| Psest_0186                 | Protein-disulfide isomerase                  | -0.5       | 0.4        | 0.4   | 0.3   | 1.0          |
| <b>Fe Related</b>          |                                              |            |            |       |       |              |
| Psest_0954                 | Fe-S oxidoreductase                          | -2.2       | 0.3        | 0.4   | 0.1   | 2.6          |
| Psest_0953                 | Iron-sulfur cluster-binding protein          | -2.2       | 0.2        | 0.2   | 0.3   | 2.4          |
| Psest_1463                 | Fe-S center assembly, SufE                   | -0.6       | 1.0        | 0.5   | 0.6   | 1.2          |
| <b>Hypothetical</b>        |                                              |            |            |       |       |              |
| Psest_3489                 | Hypothetical protein                         | -1.3       | 0.0        | 1.9   | 0.2   | 3.2          |
| Psest_0952                 | Uncharacterized conserved protein            | -2.7       | 0.5        | 0.2   | 0.5   | 2.8          |
| Psest_4003                 | TIGR00153 family protein                     | -1.4       | 0.5        | 0.6   | 0.4   | 2.1          |
| Psest_2385                 | Hypothetical protein                         | -0.6       | 0.7        | 0.5   | 1.2   | 1.1          |
| <b>Other</b>               |                                              |            |            |       |       |              |
| Psest_3490                 | Signal transduction histidine kinase         | -1.2       | 0.9        | 1.5   | 0.6   | 2.7          |
| Psest_0999                 | Response regulator                           | -0.7       | 0.5        | 1.0   | 0.6   | 1.7          |
| Psest_0951                 | FAD/FMN-containing dehydrogenases            | -0.6       | 0.2        | 1.0   | 0.1   | 1.6          |
| Psest_2418                 | Diguanylate cyclase (GGDEF) domain           | -0.7       | 0.4        | 0.9   | 0.4   | 1.6          |
| Psest_3042                 | Nitrate reductase cytochrome c-type , NapB   | -0.6       | 0.2        | 0.8   | 1.3   | 1.4          |
| Psest_3573                 | dTDP-4-dehydrorhamnose reductase             | 0.0        | 0.5        | 1.4   | 0.3   | 1.4          |
| Psest_1974                 | Integration host factor, IhfA                | -1.0       | 0.3        | 0.4   | 0.0   | 1.4          |
| Psest_0092                 | Phosphonate C-P lyase system protein PhnK    | -0.9       | 0.6        | 0.5   | 0.3   | 1.4          |
| Psest_2590                 | 3-isopropylmalate dehydratase, small subunit | -0.9       | 0.5        | 0.4   | 0.2   | 1.3          |
| Psest_2988                 | Aspartate kinase, monofunctional class       | -4.0       | 0.7        | -2.7  | 0.3   | 1.3          |
| Psest_0722                 | Predicted ATPase                             | -0.9       | 0.4        | 0.3   | 0.6   | 1.2          |
| Psest_0466                 | Lipopolysaccharide kinase (Kdo/WaaP)         | -1.2       | 0.5        | 0.0   | 0.2   | 1.2          |
| Psest_0839                 | cAMP-binding proteins                        | -0.1       | 0.2        | 1.1   | 0.2   | 1.2          |
| Psest_2023                 | Isocitrate dehydrogenase                     | -1.3       | 1.2        | -0.1  | 0.3   | 1.2          |
| Psest_3323                 | Ribonuclease, Rne/Rng family                 | -0.8       | 0.2        | 0.4   | 0.5   | 1.2          |
| Psest_3377                 | FKBP-type prolyl cis-trans isomerases        | -0.1       | 0.9        | 1.0   | 1.0   | 1.1          |
| Psest_3226                 | Predicted membrane protein                   | -0.6       | 0.5        | 0.5   | 1.1   | 1.1          |
| Psest_3684                 | Di- and tricarboxylate transporters          | -0.2       | 0.2        | 0.8   | 0.1   | 1.1          |
| Psest_0277                 | Non-canonical purine NTP pyrophosphatase     | -0.3       | 0.6        | 0.7   | 0.3   | 1.0          |
| Psest_0575                 | HrpA-like helicases                          | -0.8       | 0.2        | 0.2   | 1.1   | 1.0          |
| Psest_4287                 | Predicted glutamine amidotransferases        | -0.2       | 0.2        | 0.8   | 0.4   | 1.0          |
| Psest_2123                 | Carbohydrate kinase                          | -0.8       | 0.4        | 0.2   | 0.3   | 1.0          |
| Psest_1994                 | Amidases related to nicotinamidase           | 0.1        | 0.1        | 1.1   | 0.2   | 1.0          |
| Psest_1724                 | Anti-anti-sigma regulatory factor            | -1.5       | 0.4        | -0.5  | 0.3   | 1.0          |
| Psest_2949                 | Aspartyl aminopeptidase                      | 0.0        | 0.3        | 1.0   | 0.2   | 1.0          |

|            |                                          |      |     |      |     |     |
|------------|------------------------------------------|------|-----|------|-----|-----|
| Psest_0800 | Dehydrogenases                           | -0.1 | 0.1 | 0.9  | 0.0 | 1.0 |
| Psest_3047 | Methionyl-tRNA synthetase                | -0.2 | 0.6 | 0.8  | 1.0 | 1.0 |
| Psest_0393 | Methylase of chemotaxis methyl-accepting | -2.2 | 0.4 | -1.2 | 0.2 | 1.0 |
| Psest_0325 | Putative threonine efflux protein        | 0.2  | 0.1 | 1.2  | 0.1 | 1.0 |

**Table S4. Genes with  $\Delta wU \geq 1$**

| Locus Tag           | Gene Function                                 | $w_{ctrl}$ | $w_{ctrl}$ | $wU$ | $wU$  | $\Delta wU$ |
|---------------------|-----------------------------------------------|------------|------------|------|-------|-------------|
|                     |                                               | AVE        | STDEV      | AVE  | STDEV | Delta       |
| <b>Fe Related</b>   |                                               |            |            |      |       |             |
| Psest_0954          | Fe-S oxidoreductase                           | -2.2       | 0.3        | -0.7 | 0.2   | 1.5         |
| Psest_1463          | Fe-S center assembly, SufE                    | -0.6       | 1.0        | 0.8  | 1.0   | 1.4         |
| Psest_0953          | Iron-sulfur cluster-binding protein           | -2.2       | 0.2        | -0.8 | 0.3   | 1.4         |
| <b>Hypothetical</b> |                                               |            |            |      |       |             |
| Psest_0952          | Uncharacterized conserved protein             | -2.7       | 0.5        | -0.8 | 0.5   | 1.9         |
| Psest_3146          | Hypothetical protein                          | -0.9       | 0.4        | 1.0  | 0.5   | 1.8         |
| Psest_1920          | Uncharacterized protein conserved in bacteria | -0.9       | 0.5        | 0.6  | 1.1   | 1.5         |
| <b>Other</b>        |                                               |            |            |      |       |             |
| Psest_2243          | Glyceraldehyde-3-phosphate dehydrogenase      | -0.4       | 0.8        | 0.7  | 2.0   | 1.2         |
| Psest_1082          | Enoyl-CoA hydratase/carnithine racemase       | -1.5       | 0.3        | -0.4 | 0.3   | 1.1         |

Figure S1

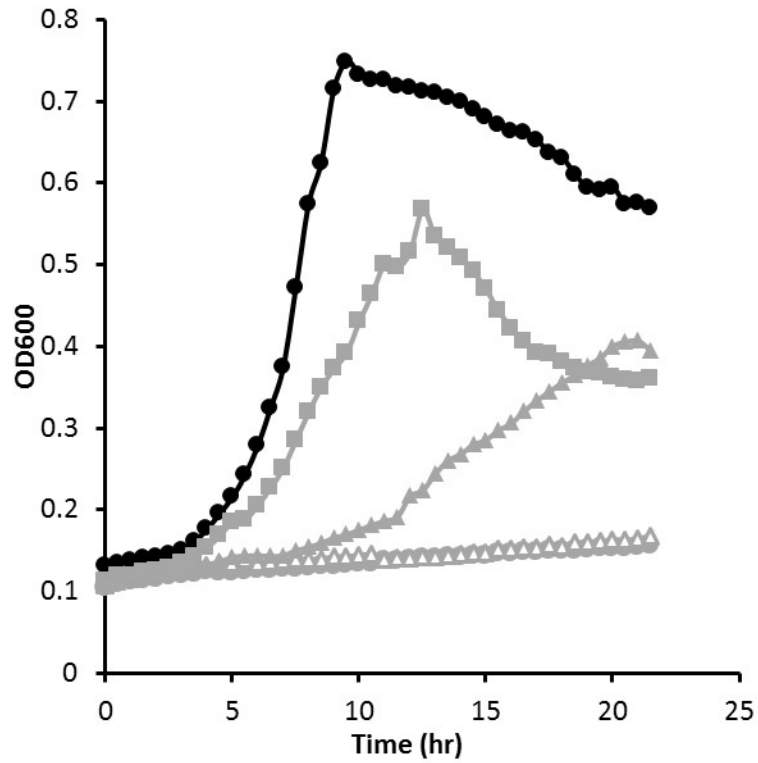

Anaerobic growth of *Pseudomonas stutzeri* RCH2 without (black) and with (gray) the addition of 80  $\mu\text{M}$   $\text{K}_2\text{Cr}_2\text{O}_7$  to the growth medium (not containing yeast extract). Various exogenously added sulfur sources include: none (closed circles), 0.1 mM sulfate (open triangles), 1 mM sulfate (closed triangles), and 0.1 mM sulfide (closed squares).

Figure S2

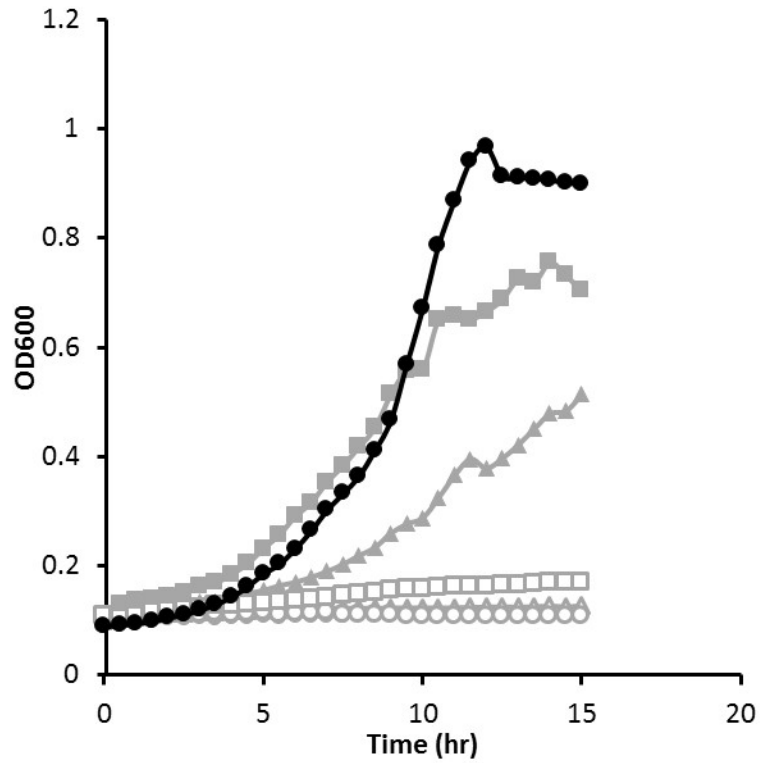

**Aerobic growth of *Pseudomonas stutzeri* RCH2 WT (black) and  $\Delta$ 2088 (gray) without yeast extract (closed circles) and with various exogenously added sulfur sources: 1 mM sulfate (open triangles), 1 mM sulfite (open circles), 0.3 mM sulfide (closed squares), 0.3 mM cysteine (open squares), and 0.1 mM thiosulfate (closed triangles).**



Figure S3

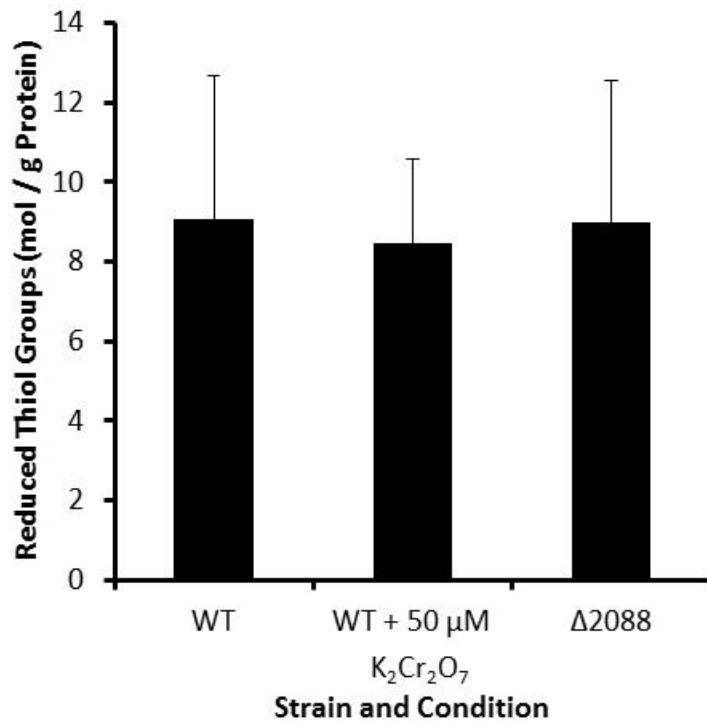

Reduced intracellular thiol concentrations of cell free extracts prepared anaerobically from anaerobically grown cultures of *Pseudomonas stutzeri* RCH2.
